# Supplementary material
Source: PubMed Central journal article supplement (PMC4468694)
Supplement: AAC.00237-15_zac007154142so1.pdf [file AAC.00237-15_zac007154142so1.pdf]

1 **Structure-activity relationship study of novel peptoids that mimic the**  
2 **structure of antimicrobial peptides**

3 Biljana Mojsoska<sup>a</sup>, Ronald N. Zuckermann<sup>b</sup> and Håvard Jenssen<sup>a</sup>

4 *Department of Nature, Systems, and Models, Medical Microbiology, Roskilde University, Universitetsvej*  
5 *1, Postboks 260, 4000 Roskilde, Denmark<sup>a</sup> and Molecular Foundry, Lawrence Berkeley National*  
6 *Laboratory, Berkeley, CA 94720<sup>b</sup>*

7 Corresponding Author: [jenssen@ruc.dk](mailto:jenssen@ruc.dk)

8

9 **Supplementary Material**

10

11 **Figure S1.** Schematic presentation of sub-monomeric solid phase peptoid synthesis

12 **Figure S2.** Antimicrobial activity and hydrophobicity correlation in *E. coli*, *S. aureus* and *P.*  
13 *aeruginosa*

14 **Figure S3.** Percentage hemolysis at 128 µg/ml and percentage cell viability at three highest  
15 concentrations for selected peptoids

16 **Figure S4.** Growth inhibition curves for GN-2-Nlys<sub>1-4</sub> Ntrp<sub>5-8</sub> Nile<sub>9</sub> and GN-2-Npm<sub>9</sub> peptoids

17 **Figure S5.** Chemical structures of all peptoids in the present study

18 **Table S1.** Sequence, retention time (Rt) and activity data of peptoids with Mlys substitution

19 **Table S2.** Sequence, retention time (Rt) and activity data of peptoids with Ntrp substitution

20 **Table S3.** Sequence, retention time (Rt) and activity data of peptoids with single monomer  
21 substitution

22 **Table S4.** Sequence, retention time (Rt) and activity data of peptoids with different sequence  
23 rearrangement

24 **Table S5.** Sequence, retention time (Rt) and activity data of peptoids with different chain length

25

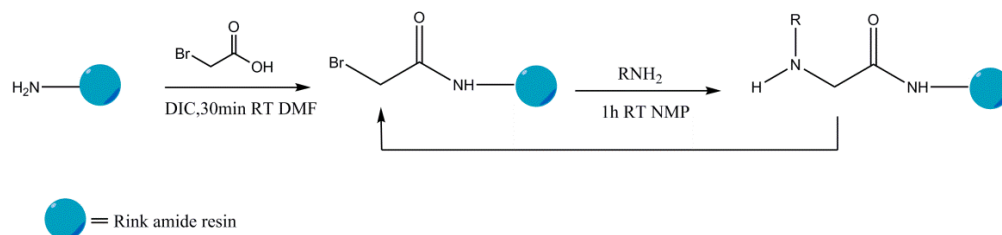

1

2

**Figure S1.** Sub-monomeric solid phase peptoid synthesis.

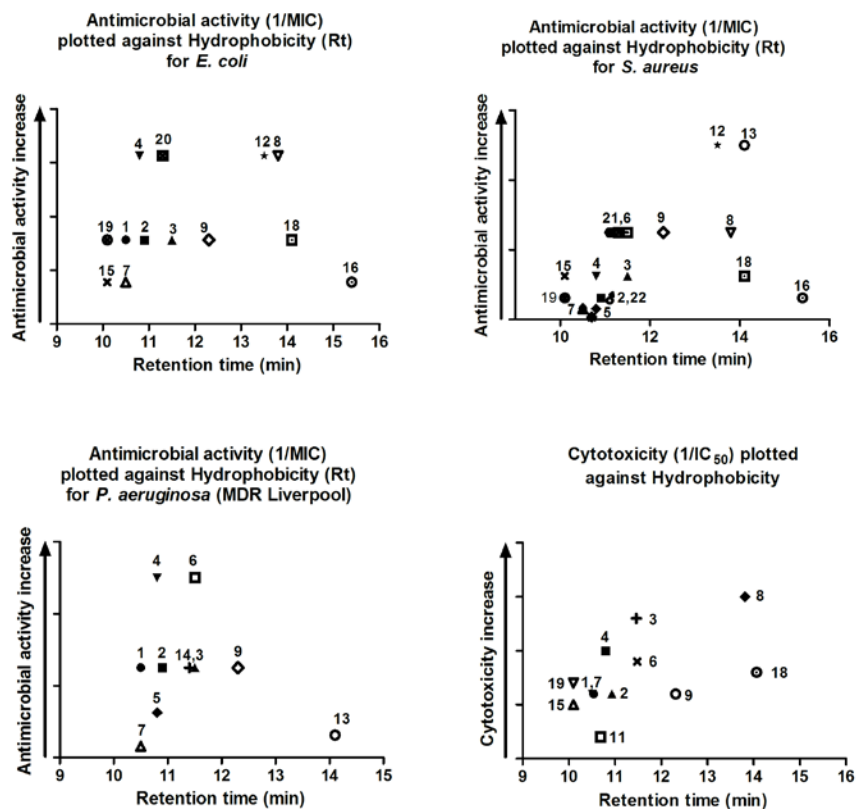

3

**Figure S2.** Hydrophobicity, reported by retention times in min on RP-HPLC, correlation to the observed antimicrobial activity (1/MIC) against three bacterial strains. *E. coli* (top left), *S. aureus* (top right) and *P. aeruginosa* (bottom left). Hydrophobicity relation to the observed cytotoxicity (1/IC<sub>50</sub>) of selected peptoids (bottom right).

7

8

9

10

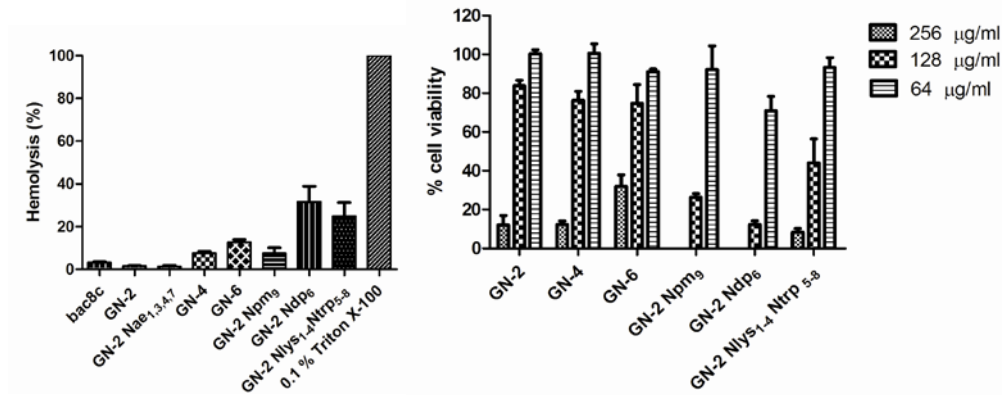

1  
 2 **Figure S3.** Hemolytic activity shown as percent hemolysis at a concentration of 128 µg/ml. Triton X-100 is used as a positive  
 3 control of 100 % hemolysis (left). Percent cell viability as estimated by MTS assay for the three highest tested concentrations for  
 4 selected peptides (right).

5

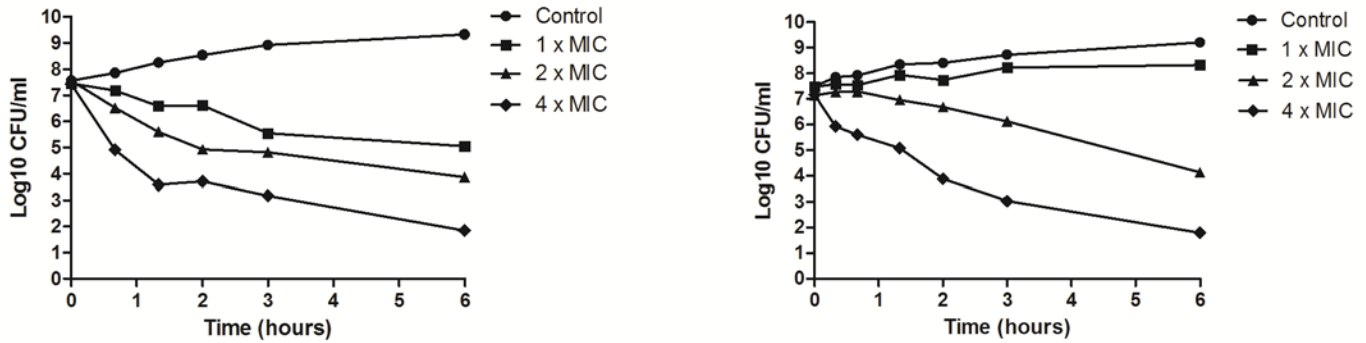

6  
 7 **Figure S4.** Growth inhibition curves for *E. coli* challenged with 1×, 2× and 4× MIC concentrations of GN-2-Nlys<sub>1-4</sub> Ntrp<sub>5-8</sub> (left)  
 8 and GN-2-Npm<sub>9</sub> peptoid (right) show concentration dependent inhibition. The inhibition with 1× MIC is more pronounced for  
 9 GN-2-Nlys<sub>1-4</sub> Ntrp<sub>5-8</sub> peptoid where significant decrease in CFU/ml is observed. Curves are representative data from three  
 10 individual experiments.

11

12

GN-2 peptoid

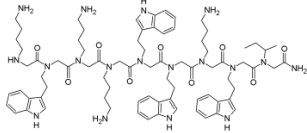

GN-2 NLY<sub>1-2</sub>NIP<sub>2-4</sub>NII<sub>5-9</sub>

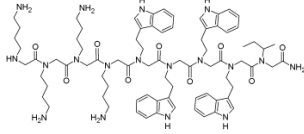

GN 2 NLY<sub>1-2,6,9</sub> NIP<sub>3-4,5,6</sub> NII<sub>7</sub>

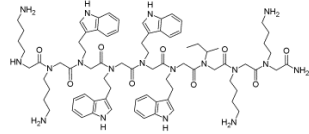

GN-2 NIP<sub>1-9</sub>

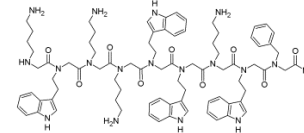

GN-2 NII<sub>1-3,4,7</sub>

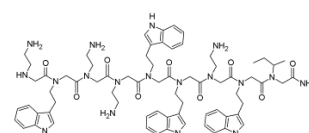

GN-2 NIP<sub>2,5,6,8</sub> NII<sub>1-9</sub>

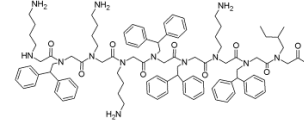

GN-2 NII<sub>1-9</sub>

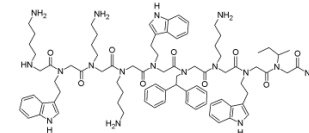

GN-4 peptoid

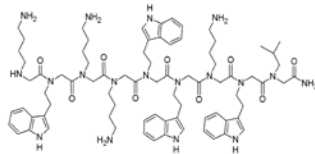

GN-4 NIP<sub>1-2,5,6,8</sub>

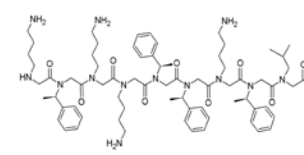

GN-4 NIP<sub>1-2,5,6,8</sub>

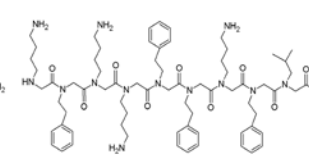

GN-4 NII<sub>1-2,5,8,9</sub>

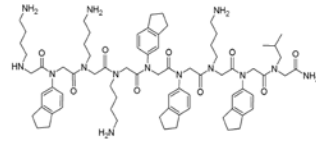

GN-4 NIP<sub>1-2,5,6,8</sub>

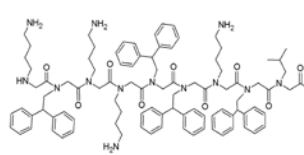

GN-4 NIP<sub>1-2,4,6,8</sub> NII<sub>1-9</sub>

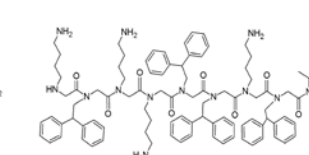

GN-4 NII<sub>1-2,5,8,9</sub> NII<sub>1-9</sub>

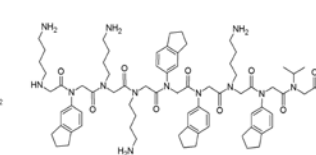

1

2

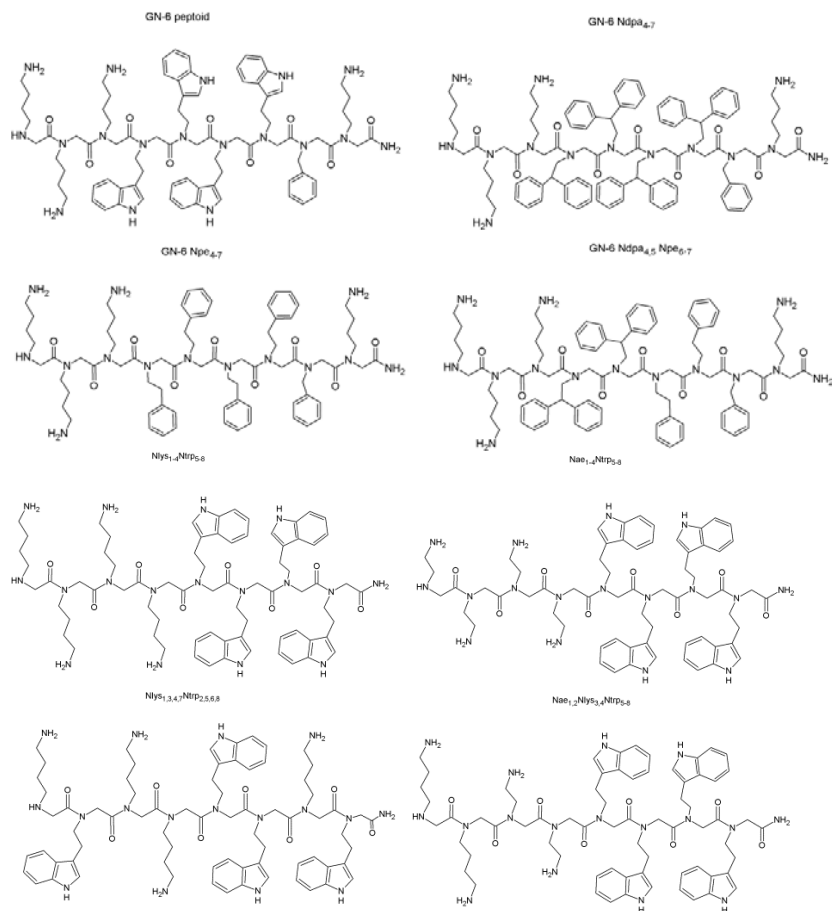

1

2

3

4

5

**Figure S5.** Chemical structures of novel peptoids. (A) GN-2 and analogs, (B) GN-4 and analogs, (C) GN-6 and analogs, (D) 8-mers.

1 **Table S1. Sequence, retention time (Rt) and activity data of peptoids with Nlys substitution**

| #  | Peptoid nomenclature                                       | Sequence (N-C)                                                 | R <sub>t</sub> (min) <sup>a</sup> | <i>S. aureus</i> | <i>E. coli</i> | <i>P. aeruginosa</i> | HC <sub>10</sub> | Selectivity Ratio | Cytotoxicity |
|----|------------------------------------------------------------|----------------------------------------------------------------|-----------------------------------|------------------|----------------|----------------------|------------------|-------------------|--------------|
|    |                                                            |                                                                |                                   | ATCC 29213       | ATCC 25922     | PAOI                 |                  |                   |              |
| 20 | Nae <sub>1,4</sub> Ntrp <sub>5,8</sub>                     | H-Nae-NNae-Nae-Nae-Ntrp-Ntrp-Ntrp-Ntrp-NH <sub>2</sub>         | 11.34                             | 4                | 16             | ND                   | 32               | 8                 |              |
| 21 | Nlys <sub>1,4</sub> Ntrp <sub>5,8</sub>                    | H-Nlys-Nlys-Nlys-Nlys-Ntrp-Ntrp-Ntrp-Ntrp-NH <sub>2</sub>      | 11.06                             | 4                | 16             | ND                   | 64               | 16                |              |
| 22 | Nae <sub>1,2</sub> Nlys <sub>3,4</sub> Ntrp <sub>5,8</sub> | H-Nae-Nae-Nlys-Nlys-Ntrp-Ntrp-Ntrp-Ntrp-NH <sub>2</sub>        | 11.11                             | 16               | 16             | 8                    | 64               | 4-8               |              |
| 5  | GN-2-Nae <sub>1,3,4,7</sub>                                | H-Nae-Ntrp-Nae-Nae-Ntrp-Ntrp-Nae-Ntrp-Nile-NH <sub>2</sub>     | 10.81                             | 32               | 16             | 16-32                | >128             | 8                 |              |
| 1  | GN-2                                                       | H-Nlys-Ntrp-Nlys-Nlys-Ntrp-Ntrp-Nlys-Ntrp-Nile-NH <sub>2</sub> | 10.54                             | 64               | 32             | 32                   | >128             | >4                | 168          |

<sup>a</sup>Analytical retention time (Rt in minutes) on a reverse phase C<sub>18</sub> Kinetex 100 x 2.1 mm 100A column, 60 °C run on a 15-65 % acetonitrile gradient over 20 min, 0.5 ml/min. ND-Not determined

5 **Table S2. Sequence, retention time (Rt) and activity data of peptoids with Ntrp substitution**

| #  | Peptoid nomenclature         | Sequence (N-C)                                                 | R <sub>t</sub> (min) <sup>a</sup> | <i>S. aureus</i> | <i>E. coli</i> | <i>P. aeruginosa</i> | HC <sub>10</sub> | Selectivity Ratio | Cytotoxicity |
|----|------------------------------|----------------------------------------------------------------|-----------------------------------|------------------|----------------|----------------------|------------------|-------------------|--------------|
|    |                              |                                                                |                                   | ATCC 29213       | ATCC 25922     | PAOI                 |                  |                   |              |
| 16 | GN-6-Ndpe <sub>4,7</sub>     | H-Nlys-Nlys-Nlys-Ndpe-Ndpe-Ndpe-Ndpe-Npm-Nlys-NH <sub>2</sub>  | 15.43                             | 16               | 64             | 64                   | 16               | 1                 |              |
| 15 | GN-6                         | H-Nlys-Nlys-Nlys-Ntrp-Ntrp-Ntrp-Ntrp-Npm-Nlys-NH <sub>2</sub>  | 10.10                             | 8-16             | 64             | 64                   | >128             | >16               | 203          |
| 17 | GN-6-Npe <sub>4,7</sub>      | H-Nlys-Nlys-Nlys-Npe-Npe-Npe-Npe-Npm-Nlys-NH <sub>2</sub>      | ND                                | 16               | 32-64          | 32-64                | 32               | 0.5-2             |              |
| 8  | GN-4-Ndpe <sub>2,5,6,8</sub> | H-Nlys-Ndpe-Nlys-Nlys-Ndpe-Ndpe-Nlys-Ndpe-Nleu-NH <sub>2</sub> | 13.81                             | 4                | 16             | 16                   | 4                | 1                 | 67           |
| 9  | GN-4-Nai <sub>2,5,6,8</sub>  | H-Nlys-Nai-Nlys-Nlys-Nai-Nai-Nlys-Nai-Nleu-NH <sub>2</sub>     | 12.31                             | 4                | 16-32          | 16-32                | 32               | 8                 | 172          |
| 11 | GN-4-Nspe <sub>2,5,6,8</sub> | H-Nlys-Nspe-Nlys-Nlys-Nspe-Nspe-Nlys-Nspe-Nleu-NH <sub>2</sub> | 10.69                             | 128              | 32             | 32                   | >128             | >4                | 631          |
| 7  | GN-4                         | H-Nlys-Ntrp-Nlys-Nlys-Ntrp-Ntrp-Nlys-Ntrp-Nleu-NH <sub>2</sub> | 10.51                             | 32               | 64             | 64                   | >128             | >4                | 166          |
| 10 | GN-4-Npe <sub>2,5,6,8</sub>  | H-Nlys-Npe-Nlys-Nlys-Npe-Npe-Nlys-Npe-Nleu-NH <sub>2</sub>     | ND                                | 64               | 64-128         | 64-128               | >128             | >1-2              |              |

<sup>a</sup>Analytical retention time (Rt in minutes) on a reverse phase C<sub>18</sub> Kinetex 100 x 2.1 mm 100A column, 60 °C run on a 15-65 % acetonitrile gradient over 20 min, 0.5 ml/min. ND-Not determined

1 **Table S3. Sequence, retention time (Rt) and activity data of peptoids with single monomer substitution**

| #  | Peptoid nomenclature                           | Sequence (N-C)                                                 | R <sub>t</sub> (min) <sup>a</sup> | <i>S. aureus</i> | <i>E. coli</i> | <i>P. aeruginosa</i> | HC <sub>10</sub> | Selectivity Ratio | Cytotoxicity |
|----|------------------------------------------------|----------------------------------------------------------------|-----------------------------------|------------------|----------------|----------------------|------------------|-------------------|--------------|
|    |                                                |                                                                |                                   | ATCC 29213       | ATCC 25922     | PAO1                 |                  |                   |              |
| 13 | GN-4-Ndpe <sub>2,5,6,8</sub> Nma <sub>9</sub>  | H-Nlys-Ndpe-Nlys-Nlys-Ndpe-Ndpe-Nlys-Ndpe-Nma-NH <sub>2</sub>  | 14.07                             | 2                | 32             | 32                   | 4                | 2                 |              |
| 8  | GN-4-Ndpe <sub>2,5,6,8</sub>                   | H-Nlys-Ndpe-Nlys-Nlys-Ndpe-Ndpe-Nlys-Ndpe-Nleu-NH <sub>2</sub> | 13.81                             | 4                | 16             | 16                   | 4                | 1                 | 67           |
| 12 | GN-4-Ndpe <sub>2,5,6,8</sub> Nval <sub>9</sub> | H-Nlys-Ndpe-Nlys-Nlys-Ndpe-Ndpe-Nlys-Ndpe-Nval-NH <sub>2</sub> | 13.5                              | 2                | 16             | 16                   | 4-8              | 2-4               |              |
| 9  | GN-4-Nai <sub>2,5,6,8</sub>                    | H-Nlys-Nai-Nlys-Nlys-Nai-Nai-Nlys-Nai-Nleu-NH <sub>2</sub>     | 12.31                             | 4                | 16-32          | 16-32                | 32               | 8                 | 172          |
| 14 | GN-4-Nai <sub>2,5,6,8</sub> Nval <sub>9</sub>  | H-Nlys-Nai-Nlys-Nlys-Nai-Nai-Nlys-Nai-Nval-NH <sub>2</sub>     | 11.37                             | 4                | 32             | 32                   | >128             | >32               |              |
| 6  | GN-2-Ndpe <sub>6</sub>                         | H-Nlys-Ntrp-Nlys-Nlys-Ntrp-Ndpe-Nlys-Ntrp-Nle-NH <sub>2</sub>  | 11.46                             | 4                | 32             | 32                   | 16               | 4                 | 80           |
| 4  | GN-2-Npm <sub>9</sub>                          | H-Nlys-Ntrp-Nlys-Nlys-Ntrp-Ntrp-Nlys-Ntrp-Npm-NH <sub>2</sub>  | 10.79                             | 8                | 16             | 16                   | 128              | 16                | 104          |
| 1  | GN-2                                           | H-Nlys-Ntrp-Nlys-Nlys-Ntrp-Ntrp-Nlys-Ntrp-Nle-NH <sub>2</sub>  | 10.54                             | 64               | 32             | 32                   | >128             | >4                | 168          |
| 7  | GN-4                                           | H-Nlys-Ntrp-Nlys-Nlys-Ntrp-Ntrp-Nlys-Ntrp-Nleu-NH <sub>2</sub> | 10.51                             | 32               | 64             | 64                   | >128             | >4                | 166          |

<sup>a</sup>Analytical retention time (Rt in minutes) on a reverse phase C<sub>18</sub> Kinetex 100 x 2.1 mm 100A column, 60 °C run on a 15-65 % acetonitrile gradient over 20 min, 0.5 ml/min. ND-Not determined

2  
3  
4

1

2 **Table S4. Sequence, retention time (Rt) and activity data of peptoids with different sequence rearrangement**

| #  | Peptoid nomenclature                                                  | Sequence (N-C)                                                 | R <sub>t</sub> (min) <sup>a</sup> | <i>S. aureus</i> | <i>E. coli</i> | <i>P. aeruginosa</i> | HC <sub>10</sub> | Selectivity Ratio | Cytotoxicity |
|----|-----------------------------------------------------------------------|----------------------------------------------------------------|-----------------------------------|------------------|----------------|----------------------|------------------|-------------------|--------------|
|    |                                                                       |                                                                |                                   | ATCC 29213       | ATCC 25922     | PAO1                 |                  |                   |              |
| 15 | GN-6                                                                  | H-Mlys-Mlys-Mlys-Ntrp-Ntrp-Ntrp-Ntrp-Npm-Mlys-NH <sub>2</sub>  | 10.10                             | 8-16             | 64             | 64                   | >128             | >16               | 203          |
| 4  | GN-2-Npm <sub>9</sub>                                                 | H-Mlys-Ntrp-Mlys-Mlys-Ntrp-Ntrp-Mlys-Ntrp-Npm-NH <sub>2</sub>  | 10.79                             | 8                | 16             | 16                   | 128              | 16                | 104          |
| 3  | GN-2-Mlys <sub>1-4</sub> Ntrp <sub>5-8</sub>                          | H-Mlys-Mlys-Mlys-Mlys-Ntrp-Ntrp-Ntrp-Ntrp-Nile-NH <sub>2</sub> | 11.48                             | 8                | 32             | 32                   | 128              | 4-32              | 110          |
| 2  | GN-2                                                                  | H-Ntrp-Ntrp-Mlys-Mlys-Mlys-Mlys-Nile-Ntrp-Ntrp-NH <sub>2</sub> | 10.93                             | 16               | 32             | 32                   | >128             | >8                | 173          |
| 1  | Ntrp <sub>1,2,8,9</sub> Nile <sub>7</sub> Nlys <sub>3-6</sub><br>GN-2 | H-Mlys-Ntrp-Mlys-Mlys-Ntrp-Ntrp-Mlys-Ntrp-Nile-NH <sub>2</sub> | 10.54                             | 64               | 32             | 32                   | >128             | >4                | 168          |
| 19 | Mlys <sub>1,3,4,7</sub> Ntrp <sub>2,5,6,8</sub>                       | H-Mlys-Ntrp-Mlys-Mlys-Ntrp-Ntrp-Mlys-Ntrp-NH <sub>2</sub>      | 10.13                             | 16               | 32             | ND                   | >256             | >16               | 148          |
| 21 | Mlys <sub>1-4</sub> Ntrp <sub>5-8</sub>                               | H-Mlys-Mlys-Mlys-Mlys-Ntrp-Ntrp-Ntrp-Ntrp-NH <sub>2</sub>      | 11.06                             | 4                | 16             | ND                   | 64               | 16                |              |

3 <sup>a</sup>Analytical retention time (Rt in minutes) on a reverse phase C<sub>18</sub> Kinetex 100 x 2.1 mm 100A column, 60 °C run on a 15-65 % acetonitrile  
4 gradient over 20 min, 0.5 ml/min. ND-Not determined

5

6 **Table S5. Sequence, retention time (Rt) and activity data of peptoids with different chain length**

| #  | Peptoid nomenclature                            | Sequence (N-C)                                                 | R <sub>t</sub> (min) <sup>a</sup> | <i>S. aureus</i> | <i>E. coli</i> | <i>P. aeruginosa</i> | HC <sub>10</sub> | Selectivity Ratio | Cytotoxicity |
|----|-------------------------------------------------|----------------------------------------------------------------|-----------------------------------|------------------|----------------|----------------------|------------------|-------------------|--------------|
|    |                                                 |                                                                |                                   | ATCC 29213       | ATCC 25922     | PAO1                 |                  |                   |              |
| 1  | GN-2                                            | H-Mlys-Ntrp-Mlys-Mlys-Ntrp-Ntrp-Mlys-Ntrp-Nile-NH <sub>2</sub> | 10.54                             | 64               | 32             | 32                   | >128             | >4                | 168          |
| 7  | GN-4                                            | H-Mlys-Ntrp-Mlys-Mlys-Ntrp-Ntrp-Mlys-Ntrp-Nleu-NH <sub>2</sub> | 10.51                             | 32               | 64             | 64                   | >128             | >2-4              | 166          |
| 19 | Mlys <sub>1,3,4,7</sub> Ntrp <sub>2,5,6,8</sub> | H-Mlys-Ntrp-Mlys-Mlys-Ntrp-Ntrp-Mlys-Ntrp-NH <sub>2</sub>      | 10.13                             | 16               | 32             | ND                   | >256             | >16               | 148          |
| 3  | GN-2-Mlys <sub>1-4</sub> Ntrp <sub>5-8</sub>    | H-Mlys-Mlys-Mlys-Mlys-Ntrp-Ntrp-Ntrp-Ntrp-Nile-NH <sub>2</sub> | 11.48                             | 8                | 32             | 32                   | 128              | 4-32              | 110          |
| 21 | Mlys <sub>1-4</sub> Ntrp <sub>5-8</sub>         | H-Mlys-Mlys-Mlys-Mlys-Ntrp-Ntrp-Ntrp-Ntrp-NH <sub>2</sub>      | 11.06                             | 4                | 16             | ND                   | 64               | 16                |              |

7 <sup>a</sup>Analytical retention time (Rt in minutes) on a reverse phase C<sub>18</sub> Kinetex 100 x 2.1 mm 100A column, 60 °C run on a 15-65 % acetonitrile  
8 gradient over 20 min, 0.5 ml/min. ND-Not determined

9

10

11

12
